# Supplementary material for: Autophagy in resin monomer-initiated toxicity of dental mesenchymal cells: a novel therapeutic target of N-acetyl cysteine
Source: Royal Society of Chemistry journal article supplement (doi:10.1039/c5tb00894h), 2015-01-01
Supplement: c5tb00894h1.pdf [file c5tb00894h1.pdf]

**Supplementary Material:**

**Autophagy in resin monomer-initiated toxicity of dental mesenchymal cells: a novel therapeutic target by N-acetyl cysteine**

*Lingxin Zhu*<sup>a</sup>, *Jie Zhang*<sup>a</sup>, *Lan Xiao*<sup>a</sup>, *Shan Liu*<sup>a</sup>, *Jingjing Yu*<sup>a</sup>, *Weihai Chen*<sup>b</sup>, *Xianzheng Zhang*<sup>b</sup>,  
*Bin Peng*<sup>a,\*</sup>

<sup>a</sup> State Key Laboratory Breeding Base of Basic Science of Stomatology (Hubei-MOST) & Key Laboratory of Oral Biomedicine Ministry of Education, School & Hospital of Stomatology, Wuhan University, Wuhan, China.

<sup>b</sup> Key Laboratory of Biomedical Polymers of Ministry of Education & Department of Chemistry, Wuhan University, Wuhan, China.

\* Corresponding author. State Key Laboratory Breeding Base of Basic Science of Stomatology (Hubei-MOST) & Key Laboratory of Oral Biomedicine Ministry of Education, School & Hospital of Stomatology, Wuhan University, 237 Luoyu Road, Wuhan 430079, P.R. China. Tel: + 86 27 87161981; fax: +86 27 87873260.

*E-mail address:* [psh301@vip.163.com](mailto:psh301@vip.163.com) (B. Peng)

## **1 Supplementary Materials and methods**

### **1.1 Transmission electron microscopy (TEM) analysis of TEGDMA nanoparticles**

To detect the possible self-assembled nanoparticles from TEGDMA and measure the particle size, the original TEGDMA was suspended in PBS at 3 mM and sonicated for 5 min. Then a drop from the suspension was dropped over the copper-coated carbon grids. Grids were properly dried and examined under a Hitachi H-600 Transmission Electron Microscope. Selected area electron diffraction (SAED) patterns were also taken using this instrument. The composition of the self-assembled nanoparticles was determined by electron dispersive X-ray (EDX) analysis to exclude chemical contamination.

### **1.2 Bio-TEM Observation of TEGDMA-treated human dental mesenchymal cells (DMCs)**

Bio-TEM was carried out to determine the possible consumption of self-assembled nanoparticles in TEGDMA-treated DMCs. Briefly, DMCs were seeded in 6-well plates and incubated with 3 mM TEGDMA for 6 h. Cells were washed with PBS and fixed overnight using 2.5% glutaraldehyde. This was followed by secondary fixation with 1% osmium tetroxide, then dehydration in a gradient ethanol series. Embedded samples were sectioned and examined under a Hitachi H-600 Transmission Electron Microscope. Uranyl acetate staining was not used in this study to avoid uranyl acetate precipitation interfering with the TEM observation.

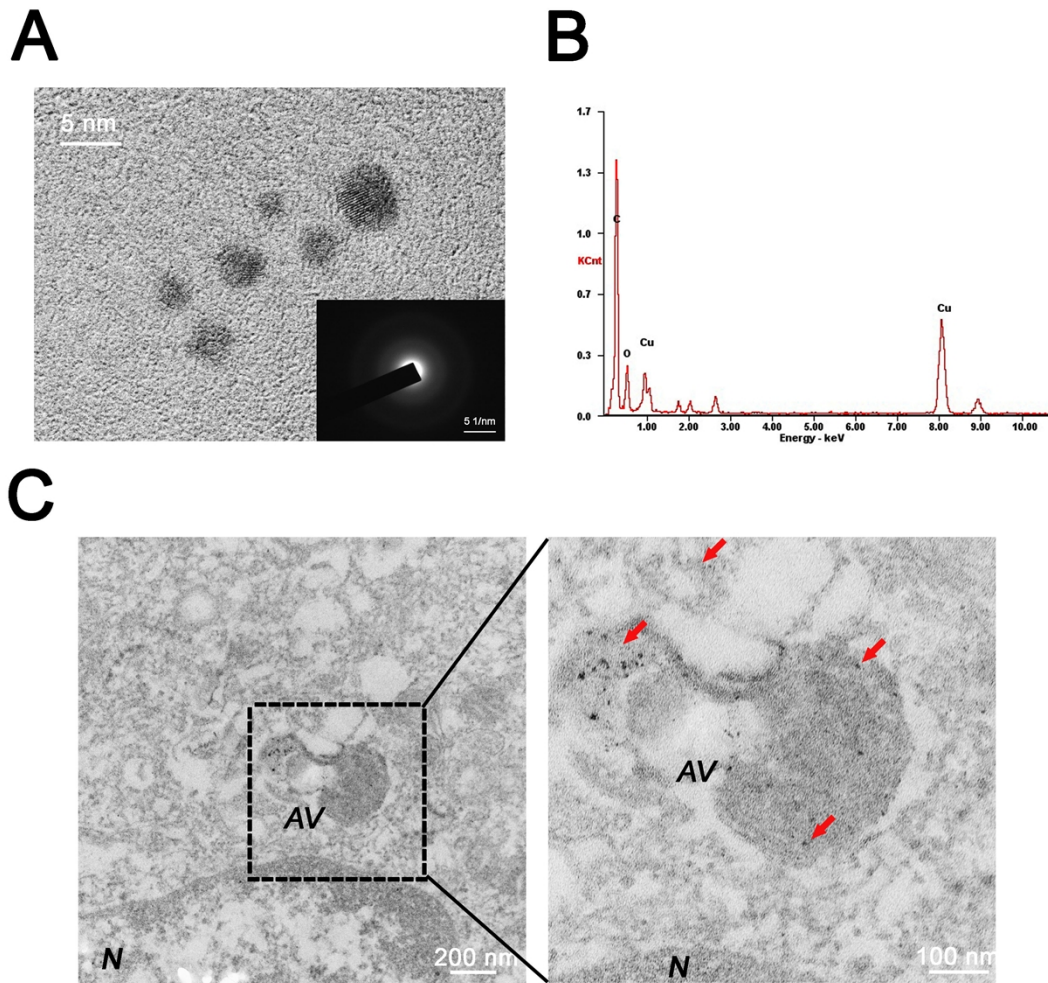

**Supplementary Fig. 1** TEGDMA partially self-assembled into nanoparticles and entered into DMCs accompanied by autophagosomes. TEM and SAED observation (A), as well as EDX analysis (B) of self-assembled TEGDMA nanoparticles. (C) Detection of TEGDMA nanoparticles consumption and autophagic vacuoles in DMCs. *AV*, autophagic vacuoles; *N*, nuclear.
